# Supplementary material
Source: Springer Nature journal article supplement (https://www.springermedizin.de/resource/supplementary/12911_2012_510_MOESM1_ESM.pdf/9526050)
Supplement: MOESM1 [file 9526050]

Select patient: View or update Care Status

MD:  As of: Now FY '11-'12  
 Patient:  Sort by: Name

Patient name filter:  » Click to apply filter  
 » Click to deroster this patient  
 » Click to roster a new patient

- » Export Patient Visit Note: Click:  Interview + Exam  Interview + Exam + Management  Interview + Exam + Management + Test Results  All Care
- » Print Patient Visit Note: Click:  Chronic Disease Mgmt  Chronic Disease + Preventive Care  Chronic Disease + Preventive Care + Billings  Print Rx Note
- » Print Patient MOH Form: Click:  Laboratory Requisition  Laboratory Requisition (no date)

Show Demographics

Hide: Dashboard

Dashboard

Diabetes Care (Status/Trends)

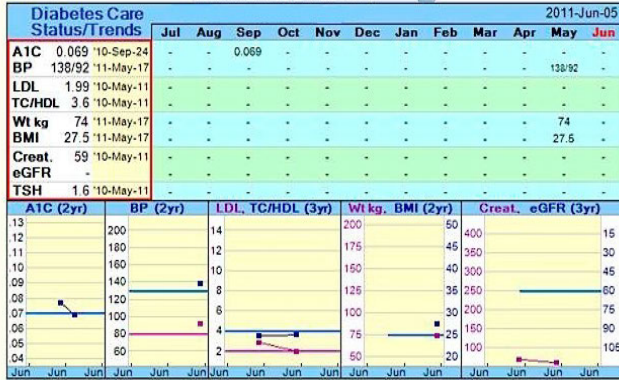

Hide: Memberships & Goals / Tracking

Registry Memberships & Care Goals / Tracking

Memberships

| Notes | Dx Yr | Registry | Current membership | Change |
|-------|-------|----------|--------------------|--------|
|       |       | Diabetes | YES                |        |

Show TrackerFlowSheet

Hide: DynaFlowSheet

Choose an optional registry FlowSheet: -- All registries --

Profile

Diabetes Type Onset  
 Type 1

| Diagnoses & Problems | Onset |
|----------------------|-------|
| hypertension         |       |
| dyslipidemia         |       |
| epilepsy             |       |
|                      |       |
|                      |       |

| Discontinued medications | Reason |
|--------------------------|--------|
|                          |        |
|                          |        |
|                          |        |

| Health Care Providers | Role |
|-----------------------|------|
|                       |      |
|                       |      |
|                       |      |

| Internal Providers |
|--------------------|
| Rose Otto - Rose   |
|                    |
|                    |

Chronic Disease Care

Select patient: View or update Care Status

MD:  As of: Now FY '11-'12  
 Patient:  Sort by: Name

Patient name filter:  » Click to apply filter  
 » Click to deroster this patient  
 » Click to roster a new patient

- » Export Patient Visit Note: Click:  Interview + Exam  Interview + Exam + Management  Interview + Exam + Management + Test Results  All Care
- » Print Patient Visit Note: Click:  Chronic Disease Mgmt  Chronic Disease + Preventive Care  Chronic Disease + Preventive Care + Billings  Print Rx Note
- » Print Patient MOH Form: Click:  Laboratory Requisition  Laboratory Requisition (no date)

Show Demographics

Hide: Dashboard

Dashboard

Diabetes Care (Status/Trends)

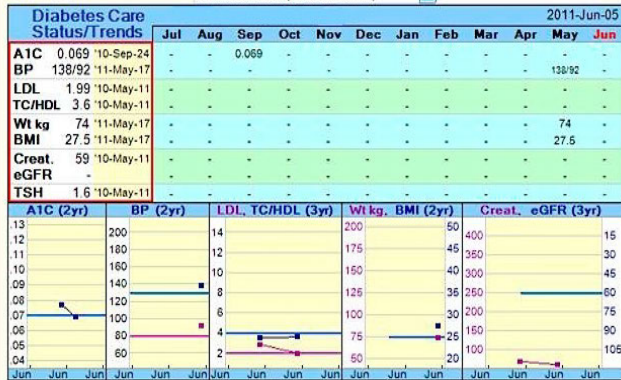

Hide: Memberships & Goals / Tracking

Registry Memberships & Care Goals / Tracking

Memberships

| Notes | Dx Yr | Registry | Current membership | Change |
|-------|-------|----------|--------------------|--------|
|       |       | Diabetes | YES                |        |

Show TrackerFlowSheet

Hide: DynaFlowSheet

Choose an optional registry FlowSheet: -- All registries --

Profile

Diabetes Type  Onset   
 Type 1

| Diagnoses & Problems | Onset |
|----------------------|-------|
| hypertension         |       |
| dyslipidemia         |       |
| epilepsy             |       |
|                      |       |
|                      |       |

| Discontinued medications | Reason |
|--------------------------|--------|
|                          |        |
|                          |        |
|                          |        |

| Health Care Providers | Role |
|-----------------------|------|
|                       |      |
|                       |      |
|                       |      |

| Internal Providers |
|--------------------|
| Rose Otto - Rose   |
|                    |
|                    |
|                    |

Chronic Disease Care
